# Supplementary material for: On the Accuracy of Genomic Selection
Source: PubMed Central journal article supplement (PMC4913905; doi:10.1371/journal.pone.0156086), 2016-06-20
Supplement: pone.0156086.s002.pdf [file pone.0156086.s002.pdf]

## S2 Text. Supplementary material for the manuscript “On the accuracy of genomic selection”

Let  $c_{jj'}$  denote the recombination rate between loci  $j$  and  $j'$  (Haldane model in this paper),  $N_e$  the effective population size,  $n_{\text{TRN}}$  the sample size and  $r_{jj'}^2$ , the squared Pearson correlation of genotypes at the two loci (LD). According to the formula p.77 of Hill and Weir (1988), we have

$$\mathbb{E}(r_{jj'}^2) = g(\Gamma_{jj'})$$

where

$$g(\Gamma_{jj'}) = \frac{(10 + \Gamma_{jj'})}{(2 + \Gamma_{jj'})(11 + \Gamma_{jj'})} \left( 1 + \frac{(3 + \Gamma_{jj'})(12 + 12\Gamma_{jj'} + \Gamma_{jj'}^2)}{n_{\text{TRN}}(2 + \Gamma_{jj'})(11 + \Gamma_{jj'})} \right),$$

$$\Gamma_{jj'} = 4N_e c_{jj'}.$$

Since we are only able to get an estimated LD between the two loci  $j$  and  $j'$ , we can reasonably consider that

$$\hat{r}_{jj'}^2 = g(\Gamma_{jj'}) + \varepsilon$$

where  $\varepsilon$  denotes some noise. Then, the  $N_e$  can be estimated in the following way,

$$\widehat{N}_e = \arg \min_{N_e} \sum \{ \hat{r}_{jj'}^2 - g(\Gamma_{jj'}) \}^2$$

where the sum is over all the pairs of loci.

### References

Hill, WG and Weir, BS (1998) Variances and covariances of squared linkage disequilibria in finite population. *Theoretical population biology*, **33(1)**, 54-78.
