# Supplementary material for: On the Accuracy of Genomic Selection
Source: PubMed Central journal article supplement (PMC4913905; doi:10.1371/journal.pone.0156086), 2016-06-20
Supplement: pone.0156086.s003.pdf [file pone.0156086.s003.pdf]

**S1 Table. Supplementary material for the manuscript  
“On the accuracy of genomic selection”**

Table 1: Comparison between different estimators ( $M_{e1}$ ,  $M_{e2}$ ,  $M_{e3}$  and  $M_{LJ}$ ) of the number of effective loci and the quantity  $n_{\text{TRN}}\mathbb{E}\left(\|\mathbf{x}'_{n_{\text{TRN}}+1}\mathbf{X}'\mathbf{V}^{-1}\|^2\right)$ . For a given architecture, a mean was computed on 100 replicates (variance is shown in brackets) and the TRN incidence matrix did not vary across replicates ( $n_{\text{TRN}}=1,000$ ,  $\lambda$  is based on the heritability).

| Nb QTLs | Nb generations | Nb Markers | $n_{\text{TRN}}\mathbb{E}\left(\ \mathbf{x}'_{n_{\text{TRN}}+1}\mathbf{X}'\mathbf{V}^{-1}\ ^2\right)$ | $M_{LJ}$      | $M_{e1}$ | $M_{e2}$ | $M_{e3}$ |
|---------|----------------|------------|-------------------------------------------------------------------------------------------------------|---------------|----------|----------|----------|
| 2       | 30             | 100        | 60.33 (1.53)                                                                                          | 52.33 (0.40)  | 12.49    | 14.60    | 17.58    |
|         |                | 5,000      | 75.40 (2.17)                                                                                          | 231.2 (6.28)  | 11.36    | 13.34    | 16.16    |
|         | 50             | 100        | 69.22 (1.55)                                                                                          | 61.12 (0.15)  | 19.60    | 22.52    | 26.47    |
|         |                | 5,000      | 77.95 (1.41)                                                                                          | 280.81 (8.53) | 14.09    | 16.40    | 19.60    |
|         | 70             | 100        | 69.72 (0.73)                                                                                          | 69.95 (0.11)  | 26.38    | 30.02    | 34.84    |
|         |                | 5,000      | 90.25 (1.70)                                                                                          | 331.94 (7.88) | 21.17    | 24.26    | 28.41    |
| 100     | 30             | 100        | 88.25 (4.67)                                                                                          | 52.33 (0.41)  | 12.49    | 14.60    | 17.58    |
|         |                | 5,000      | 130.29 (7.35)                                                                                         | 231.2 (6.28)  | 11.36    | 13.34    | 16.16    |
|         | 50             | 100        | 85.80 (3.04)                                                                                          | 61.12 (0.14)  | 19.60    | 22.52    | 26.47    |
|         |                | 5,000      | 109.59 (3.47)                                                                                         | 280.81 (8.53) | 14.09    | 16.40    | 19.60    |
|         | 70             | 100        | 82.38 (1.22)                                                                                          | 69.95 (0.11)  | 26.38    | 30.02    | 34.84    |
|         |                | 5,000      | 115.97 (3.33)                                                                                         | 331.94 (7.88) | 21.17    | 24.26    | 28.41    |
