# Supplementary material for: On the Accuracy of Genomic Selection
Source: PubMed Central journal article supplement (PMC4913905; doi:10.1371/journal.pone.0156086), 2016-06-20
Supplement: pone.0156086.s004.pdf [file pone.0156086.s004.pdf]

S1 Fig. Supplementary material for the manuscript  
“On the accuracy of genomic selection”

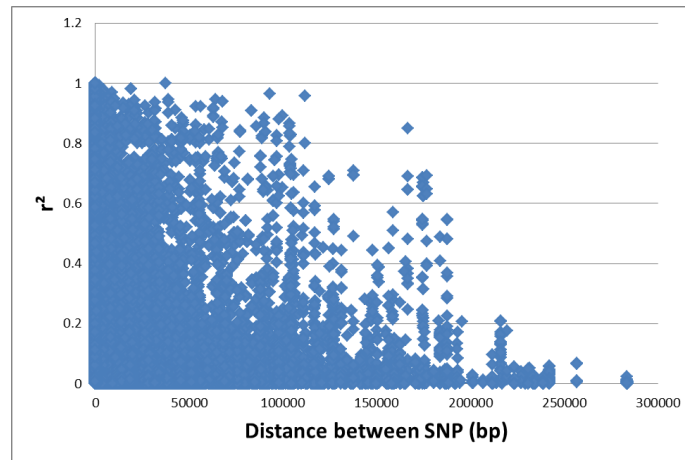

Fig 1: Linkage Disequilibrium (LD), measured with  $r^2$ , computed for the perennial ryegrass dataset, and associated with each pair of SNPs within scaffolds.
